# Supplementary material for: Design and Testing of Effective Primers for Amplification of the orf7 Gene of Phage WO Associated with Andricus hakonensis
Source: MDPI journal article supplement (doi:10.3390/insects12080713), 2021-08-09
Supplement: s1 [file s1]

Supplementary **Table S1.** Genomes used for primer design in this study

| Supergroup | Strain  | Host                              | Accession         |
|------------|---------|-----------------------------------|-------------------|
| A          | wMel    | <i>Drosophila melanogaster</i>    | NC002978          |
| A          | wInc_Cu | <i>Drosophila incompta</i>        | CP011148          |
| A          | wRi     | <i>Drosophila simulans</i>        | CP001391          |
| A          | wCauA   | <i>Carposina sasakii</i>          | CP041215          |
| A          | wHa     | <i>Drosophila simulans</i>        | NC021089          |
| A          | wMelPop | <i>Drosophila melanogaster</i>    | NZ_AQQE00000000.1 |
| A          | wYak    | <i>Drosophila yakuba</i>          | NZ_VCEF00000000.1 |
| A          | wAu     | <i>Drosophila simulans</i>        | NZ_LK055284.1     |
| A          | wRec    | <i>Drosophila recens</i>          | NZ_JQAM00000000.1 |
| A          | wAna    | <i>Drosophila ananassae</i>       | NZ_CP042904.1     |
| A          | wSpc    | <i>Drosophila subpulchrella</i>   | NZ_NTHL00000000.1 |
| A          | wSuzi   | <i>Drosophila suzukii</i>         | NZ_CAOU00000000.2 |
| A          | wOneA1  | <i>Nasonia oneida</i>             | NZ_QESS00000000.1 |
| A          | wUni    | <i>Muscidifurax uniraptor</i>     | NZ_MUJL01000001.1 |
| A          | wVitA   | <i>Nasonia vitripennis</i>        | NZ_MUJM01000001.1 |
| A          | wGmo    | <i>Glossina morsitans</i>         | NZ_AWUH00000000.1 |
| A          | wNfla   | <i>Nomada flava</i>               | NZ_LYUW00000000.1 |
| A          | wNleu   | <i>Nomada leucophthalma</i>       | NZ_LYUV00000000.1 |
| A          | wNpa    | <i>Nomada panzeri</i>             | NZ_LYUX00000000.1 |
| A          | wNfe    | <i>Nomada ferruginata</i>         | NZ_LYUY00000000.1 |
| A          | wDacA   | <i>Dactylopius coccus</i>         | NZ_LSYX00000000.1 |
| B          | wMeg    | <i>Chrysomya megacephala</i>      | CP021120          |
| B          | wPipPel | <i>Culex quinquefasciatus Pel</i> | NC010981          |
| B          | wTpre   | <i>Trichogramma pretiosum</i>     | CM003641          |
| B          | wAlbB   | <i>Aedes albopictus</i>           | CP031221          |
| B          | wBol1-b | <i>Hypolimnas bolina</i>          | NZ_CAOH00000000.1 |
| B          | wPipMol | <i>Culex molestus</i>             | NZ_CTEH00000000.1 |
| B          | wAus    | <i>Plutella Australiana</i>       | NZ_MRWX01000001   |
| B          | wOb     | <i>Operophtera brumata</i>        | NZ_JYPC00000000.1 |
| B          | wLcla   | <i>Leptopilina clavipes</i>       | NZ_QJHA00000000.1 |
| B          | wVitB   | <i>Nasonia vitripennis</i>        | NZ_AERW00000000.1 |
| B          | wDacB   | <i>Dactylopius coccus</i>         | NZ_LSYX00000000.1 |
| B          | wStri   | <i>Laodelphax striatellus</i>     | NZ_MUIX00000000.1 |
| B          | wDi     | <i>Diaphorina citri</i>           | NZ_AMZJ01000001.1 |
| B          | wLug    | <i>Nilaparvata lugens</i>         | NZ_MUIY00000000.1 |
| B          | wCon    | <i>Cylisticus convexus</i>        | NZ_QPIP00000000.1 |
| B          | wVulC   | <i>Armadillidium vulgare</i>      | NZ_ALWU01000001.1 |
